# Supplementary material for: Immune checkpoint inhibitor-associated gastrointestinal adverse events in patients with colorectal cancer
Source: Research Square preprint supplement (doi:10.21203/rs.3.rs-4248366/v1), 2024-04-19
Supplement: Supplementary file 1 [file 71793e288e26bff12f42e282.docx]

| **Table 1.** Patient Characteristics, N=18 | |
| --- | --- |
| **Characteristic** | **No (%)** |
| Age, years, median (IQR) | 69.5 (50-73) |
| Sex, male | 11 (61.1) |
| Race, white | 16 (88.8) |
| Cancer type |  |
| Melanoma* | 2 (11) |
| Genitourinary * | 1 (5.5) |
| Gastrointestinal | 18 (100) |
| Cancer stage |  |
| III | 5 (27.7) |
| IV | 13 (72.2) |
| MSI status of tumor |  |
| MSI - High | 12 (66.6) |
| MSI - Stable† | 3 (16.6) |
| Unavailable | 3 (16.6) |
| Type of ICI |  |
| Anti–CTLA-4 monotherapy | 1 (5.5) |
| Anti–PD-1/L1 monotherapy | 8 (44.4) |
| Combination anti–CTLA-4 and anti–PD-1/L1 | 9 (50) |
| Cycles of ICI, median (IQR) | 6 (2.5-10) |
| Other gastrointestinal irAE |  |
| Hepatitis | 14 (41.1) |
| Pancreatitis | 2 (5.8) |
| Active treatment with other chemotherapy |  |
| Continued with ICI | 5 (27.7) |
| Continued with other chemotherapy | 2 (5.8) |
| Median time duration of ICI therapy, months (IQR) | 3.5 (0-7) |
| Median time duration from gastrointestinal irAE diagnosis and first dose of ICI, days (IQR) | 259 (70-444) |
| Abbreviations: CTLA-4, cytotoxic T lymphocyte antigen 4; ICI, immune checkpoint inhibitor; IQR, interquartile range; PD-1/PD-L1, programmed cell death 1/programmed death ligand 1; irAE, immune related adverse event  Footnote: *2 patients were diagnosed with melanoma and 1 patient with genitourinary cancer and then subsequently diagnosed with colorectal cancer.  † Patients in the MSS - Stable group, received ICI due to alternative reasons such as different clinical trials as well as other secondary cancers where ICI was indicated | |

| **Table 2**. Characteristics of gastrointestinal irAE in patients with colorectal cancer, N=18 | |
| --- | --- |
| **Colitis, N=18** | **No. (%)** |
| Symptoms |  |
| Diarrhea | 18 (100) |
| Abdominal pain | 18 (100) |
| Nausea/vomiting | 1 (5.5) |
| Median fecal calprotectin before treatment (IQR), N=8 | 641 (347-1560.5) |
| Median CTCAE grade of colitis (IQR) | 1 (0.5-2) |
| Median CTCAE grade of diarrhea (IQR) | 2 (2-3) |
| Grade I diarrhea | 10 (55.5) |
| Grade II diarrhea | 6 (33.3) |
| Grade III and IV diarrhea | 2 (5.8) |
| Hospitalization required, N (%) | 4 (22.2) |
| Cancer treatment withheld due to toxicity, N (%) | 11 (61.1) |
| All-cause mortality, N (%) | 7 (38.8) |
| Abbreviations: CTCAE v5, Common Terminology Criteria for Adverse Events version 5; ICI, immune checkpoint inhibitor; IMC, immune-mediated colitis; IQR, interquartile range; TNF, tumor necrosis factor; FMT, fecal microbiota transplantation; irAE, immune related adverse event | |

| **Table 3**. Endoscopy-related characteristics for patients diagnosed with colitis, N=18 | |
| --- | --- |
| **At the time of colitis diagnosis** | **No. (%)** |
| Endoscopic findings | 5 (27.7) |
| Ulcers | 2 (40) |
| Non-ulcer inflammation | 2 (40) |
| Normal | 1 (20) |
| Histologic findings |  |
| Active inflammation | 4 (80) |
| Normal | 1 (20) |
| Treatment of IMC |  |
| Corticosteroids | 18 (100) |
| Corticosteroids plus biologic * | 4 (22.1) |
| FMT | 1 (5.5) |
| Complications of IMC | 1 (5.5) |
| Perforation | 1 (5.5) |

3 patients received Infliximab; 1 patient received Vedolizumab.
